# Supplementary material
Source: PubMed Central journal article supplement (PMC5155304)

Table S1 Ingredients of the purified rat chow diet

| <u>Ingredients</u> | <u>g/kg</u> |
|--------------------|-------------|
| casein             | 200.0       |
| L-cystine          | 3.0         |
| corn starch        | 300.5       |
| maltodextrin       | 120.0       |
| sucrose            | 100.0       |
| soybean oil        | 70.0        |
| cellulose          | 150.0       |
| mineral mix        | 42.0        |
| vitamin mix        | 12.0        |
| choline bitartrate | 2.5         |
| TBHQ antioxidan    | 0.014       |

Table S2 The OTUs exhibiting a significant change in frequency from 0-6 days of exposure to 1.5% oxalate. Data are arranged in order of fold change as a range of values for the OTUs in that taxon. Fold change was  $\log_2$  transformed so that a positive value reflects a significant increase in frequency and a negative value reflects a significant decrease. Taxons with OTUs that either increased or decreased are listed separately. Bolded taxa contain specific OTUs that exhibited a significant positive correlation with oxalate consumption in *N. albigula* (Miller in review)

A) Transplant group

| <b>Lowest Assigned Taxonomy</b> | <b>Taxonomic Level</b> | <b># of OTUs</b> | <b>Fold Change</b> | <b>P</b>              |
|---------------------------------|------------------------|------------------|--------------------|-----------------------|
| <b>S24-7</b>                    | <b>family</b>          | <b>54</b>        | <b>0.38-7.78</b>   | <b>&lt;0.001-0.05</b> |
| <b>Oscillospira</b>             | <b>genus</b>           | <b>8</b>         | <b>0.25-7.78</b>   | <b>&lt;0.001-0.02</b> |
| Coproccoccus                    | genus                  | 5                | 0.85-7.53          | <0.001                |
| <b>Ruminococcus</b>             | <b>genus</b>           | <b>12</b>        | <b>1.02-7.35</b>   | <b>&lt;0.001-0.02</b> |
| Desulfovibrionaceae             | family                 | 1                | 6.15               | <0.001                |
| <b>Clostridiales</b>            | <b>order</b>           | <b>47</b>        | <b>0.33-5.71</b>   | <b>&lt;0.001-0.03</b> |
| Lachnospiraceae                 | family                 | 17               | 0.71-5.69          | <0.001-0.03           |
| Bacteroides                     | genus                  | 27               | 0.33-5.24          | <0.001-0.03           |
| <b>Allobaculum</b>              | <b>genus</b>           | <b>8</b>         | <b>0.35-5.14</b>   | <b>&lt;0.001-0.02</b> |
| Ruminococcaceae                 | family                 | 10               | 0.72-3.26          | <0.001-0.02           |
| Parabacteroides                 | genus                  | 7                | 0.22-3.15          | <0.001-0.03           |
| RF39                            | order                  | 1                | 3.11               | 0.04                  |
| Coproccoccus                    | genus                  | 1                | 3.05               | 0.001                 |
| YS2                             | order                  | 2                | 1.58-3.02          | <0.001                |
| Rc4-4                           | genus                  | 1                | 2.99               | 0.002                 |
| <b>Proteus</b>                  | <b>genus</b>           | <b>1</b>         | <b>2.09</b>        | <b>&lt;0.001</b>      |
| Bacillus                        | genus                  | 1                | 1.87               | <0.001                |
| <b>Rikenellaceae</b>            | <b>family</b>          | <b>5</b>         | <b>0.28-1.81</b>   | <b>&lt;0.001</b>      |
| Bacillaceae                     | family                 | 1                | 1.79               | <0.001                |
| Bacteroidales                   | order                  | 4                | 0.51-1.74          | <0.001-0.04           |
| Dorea                           | genus                  | 1                | 1.38               | <0.001                |
| Bifidobacterium                 | genus                  | 2                | 1.23-1.31          | <0.001-0.01           |
| <b>Oxalobacter</b>              | <b>genus</b>           | <b>1</b>         | <b>1.27</b>        | <b>0.02</b>           |
| RF32                            | order                  | 1                | 1.24               | <0.001                |
| Sutterella                      | genus                  | 1                | 1.19               | <0.001                |
| CF231                           | genus                  | 1                | 1.16               | <0.001                |
| Odoribacter                     | genus                  | 4                | 0.69-1.09          | <0.001-0.03           |
| Bilophila                       | genus                  | 1                | 1.04               | <0.001                |
| Lachnospira                     | genus                  | 1                | 0.76               | <0.001                |
| Neisseriaceae                   | family                 | 1                | 0.62               | 0.002                 |
| Akkermansia                     | genus                  | 2                | 0.43-0.44          | <0.001                |
| Lactobacillus                   | genus                  | 1                | 0.41               | 0.02                  |
| Turicibacter                    | genus                  | 1                | -4.29              | <0.001                |
| Rc4-4                           | genus                  | 1                | -3.77              | <0.001                |
| Proteus                         | genus                  | 1                | -3.18              | 0.01                  |
| Rothia                          | genus                  | 1                | -2.19              | <0.001                |
| Mogibacteriaceae                | family                 | 1                | -2.12              | <0.001                |
| Pediococcus                     | genus                  | 1                | -1.95              | 0.01                  |
| Roseburia                       | genus                  | 1                | -0.67              | <0.001                |
| Parabacteroides                 | genus                  | 1                | -0.35              | <0.001                |
| Christensenellaceae             | family                 | 1                | -0.77              | 0.003                 |
| Bacteroides                     | genus                  | 1                | -0.82              | <0.001                |
| Enterococcus                    | genus                  | 1                | -1.13              | <0.001                |
| Enterococcaceae                 | family                 | 1                | -1.52              | <0.001                |
| Blautia                         | genus                  | 1                | -1.88              | <0.001                |
| Adlecreutzia                    | genus                  | 1                | -1.91              | <0.001                |
| Streptococcus                   | genus                  | 3                | -(2.03-1.81)       | <0.001                |
| Actinomyces                     | genus                  | 1                | -2.09              | <0.001                |
| Enterobacteraceae               | family                 | 1                | -2.16              | <0.001                |
| Clostridiaceae                  | family                 | 2                | -(2.68-1.99)       | <0.001-0.002          |
| Firmicutes                      | phylum                 | 1                | -2.83              | <0.001                |
| Oscillospira                    | genus                  | 6                | -(3.05-0.33)       | <0.001-0.02           |
| Lactobacillus                   | genus                  | 4                | -(3.18-1.69)       | <0.001                |
| S24-7                           | family                 | 7                | -(3.61-0.45)       | <0.001                |
| Allobaculum                     | genus                  | 1                | -3.63              | <0.001                |
| Coproccoccus                    | genus                  | 2                | -(3.81-0.91)       | <0.001-0.001          |
| Prevotella                      | genus                  | 2                | -(3.88-2.04)       | <0.001-0.01           |
| Lactococcus                     | genus                  | 3                | -(3.93-1.04)       | <0.001                |
| Ruminococcaceae                 | family                 | 22               | -(4.36-0.23)       | <0.001-0.04           |
| Desulfovibrio                   | genus                  | 1                | -5                 | <0.001                |
| RF32                            | order                  | 3                | -(5.03-1.93)       | <0.001                |
| Ruminococcus                    | genus                  | 19               | -(5.64-0.35)       | <0.001-0.02           |
| Erysipelotrichaceae             | family                 | 7                | -(7.54-2.02)       | <0.001-0.02           |
| Lachnospiraceae                 | family                 | 17               | -(8.42-0.65)       | <0.001-0.02           |
| Clostridiales                   | order                  | 38               | -(9.26-0.65)       | <0.001-0.04           |
| Coproccoccus                    | genus                  | 1                | -10.13             | <0.001                |

## B) No transplant group

| <b>Lowest Assigned Taxonomy</b> | <b>Taxonomic Level</b> | <b># of OTUs</b> | <b>Fold Change</b> | <b>P</b>               |
|---------------------------------|------------------------|------------------|--------------------|------------------------|
| Coproccoccus                    | genus                  | 3                | 0.54-7.28          | <0.001-0.004           |
| <b>Proteus</b>                  | <b>genus</b>           | <b>3</b>         | <b>5.34-6.31</b>   | <b>&lt;0.001-0.005</b> |
| Ruminococcus                    | genus                  | 7                | 0.21-5.98          | <0.001-0.03            |
| Anaerostipes                    | genus                  | 1                | 5.83               | 0.004                  |
| Lachnospiraceae                 | family                 | 5                | 0.87-5.07          | <0.001-0.03            |
| RF39                            | order                  | 1                | 4.26               | <0.001                 |
| <b>Clostridiales</b>            | <b>order</b>           | <b>25</b>        | <b>0.43-3.79</b>   | <b>&lt;0.001-0.05</b>  |
| S24-7                           | family                 | 8                | 0.78-3.49          | <0.001-0.3             |
| Parabacteroides                 | genus                  | 7                | 0.21-3.02          | <0.001-0.02            |
| Bacteroides                     | genus                  | 6                | 0.33-2.57          | <0.001-0.002           |
| Ruminococcaceae                 | family                 | 4                | 0.53-2.48          | <0.001-0.005           |
| Peptococcaceae                  | family                 | 3                | 0.74-1.19          | <0.001                 |
| CH231                           | genus                  | 1                | 0.57               | <0.001                 |
| Desulfovibrio                   | genus                  | 1                | 0.55               | <0.001                 |
| Oscillospira                    | genus                  | 1                | 0.15               | 0.004                  |
| Enterobacteriaceae              | family                 | 1                | -0.24              | <0.001                 |
| Akkermansia                     | genus                  | 2                | -0.56              | <0.001                 |
| Desulfovibrionaceae             | family                 | 1                | -0.81              | <0.001                 |
| Butyricimonas                   | genus                  | 2                | -(1.11-.09)        | 0.002-0.003            |
| Bacteroidales                   | order                  | 1                | -1.19              | <0.001                 |
| Dores                           | genus                  | 1                | -1.44              | 0.007                  |
| Lactococcus                     | genus                  | 2                | -(1.47-1.45)       | <0.001                 |
| Rothia                          | genus                  | 1                | -1.48              | 0.03                   |
| Streptococcus                   | genus                  | 2                | -(1.48-1.35)       | <0.001                 |
| Rikenellaceae                   | family                 | 5                | -(1.61-0.39)       | <0.001-0.05            |
| Blautia                         | genus                  | 1                | -1.64              | <0.001                 |
| Prevotella                      | genus                  | 1                | -2.22              | <0.001                 |
| Coproccoccus                    | genus                  | 3                | -(3.42-1.43)       | <0.001-0.01            |
| Turicibacter                    | genus                  | 1                | -3.61              | <0.001                 |
| Oscillospira                    | genus                  | 15               | -(4.04-0.39)       | <0.001-0.03            |
| Bifidobacterium                 | genus                  | 2                | -(4.57-4.02)       | <0.001                 |
| Lachnospiraceae                 | family                 | 12               | -(4.85-0.66)       | <0.001-0.02            |
| Bacteroides                     | genus                  | 5                | -(4.92-0.28)       | <0.001                 |
| Pediococcus                     | genus                  | 1                | -5.17              | <0.001                 |
| RF39                            | order                  | 3                | -(5.37-1.86)       | 0.004-0.03             |
| Clastridiaceae                  | family                 | 3                | -(5.72-1.44)       | <0.001                 |
| Ruminococcaceae                 | family                 | 30               | -(6.26-0.19)       | <0.001-0.05            |
| Ruminococcus                    | genus                  | 15               | -(8.03-0.21)       | <0.001-0.04            |
| Lactobacillus                   | genus                  | 10               | -(8.44-1.81)       | <0.001-0.04            |
| Clostridiales                   | order                  | 53               | -(8.45-0.25)       | <0.001-0.04            |
| S24-7                           | family                 | 32               | -(9.46-0.41)       | <0.001-0.05            |

Table S3 The OTUs that are present in both the Donor and the Transplant group, but not the No transplant group immediately after the transplant period

| <b>Lowest Assigned Taxonomy</b> | <b>Taxonomic Level</b> | <b># of OTUs</b> |
|---------------------------------|------------------------|------------------|
| Allobaculum                     | genus                  | 14               |
| Anaerostipes                    | genus                  | 1                |
| Bacteroidales                   | order                  | 1                |
| Bacteroides                     | genus                  | 1                |
| Bifidobacteriaceae              | family                 | 1                |
| Bifidobacterium                 | genus                  | 3                |
| Caulobacteraceae                | family                 | 1                |
| Christensenellaceae             | family                 | 2                |
| Clostridiaceae                  | family                 | 2                |
| Clostridiales                   | order                  | 85               |
| Clostridium                     | genus                  | 1                |
| Coprococcus                     | genus                  | 3                |
| Desulfovermiculus               | genus                  | 1                |
| Desulfovibrio                   | genus                  | 7                |
| Erysipelotrichaceae             | family                 | 2                |
| Lachnospira                     | genus                  | 1                |
| Lacnospiraceae                  | family                 | 16               |
| Lactobacillus                   | genus                  | 6                |
| Lactobacillus reuter            | species                | 1                |
| Legionellaceae                  | family                 | 1                |
| Marinilabiaceae                 | family                 | 1                |
| Mycobacterium                   | genus                  | 1                |
| Odoribacter                     | genus                  | 5                |
| Oscillospira                    | genus                  | 38               |
| Oxalobacter                     | family                 | 1                |
| Oxalobacteraceae                | family                 | 1                |
| Parabacteroides                 | genus                  | 1                |
| Peptococcaceae                  | family                 | 1                |
| Proteus                         | genus                  | 1                |
| RF16                            | family                 | 7                |
| RF32                            | order                  | 2                |
| RF39                            | order                  | 2                |
| Rikenellaceae                   | family                 | 5                |
| Ruminococcaceae                 | family                 | 41               |
| Ruminococcus                    | genus                  | 8                |
| Ruminococcus flavefaciens       | species                | 23               |
| Ruminococcus gnavus             | species                | 3                |
| S24-7                           | family                 | 200              |
| SBYG_4172                       | family                 | 1                |
| Sphingomonas                    | genus                  | 1                |
| Treponema                       | genus                  | 1                |
| Unassigned                      | NA                     | 111              |
| YS2                             | order                  | 2                |

Figure S1 Rarefaction analysis for all samples. Curves are color-coded by microbial treatment

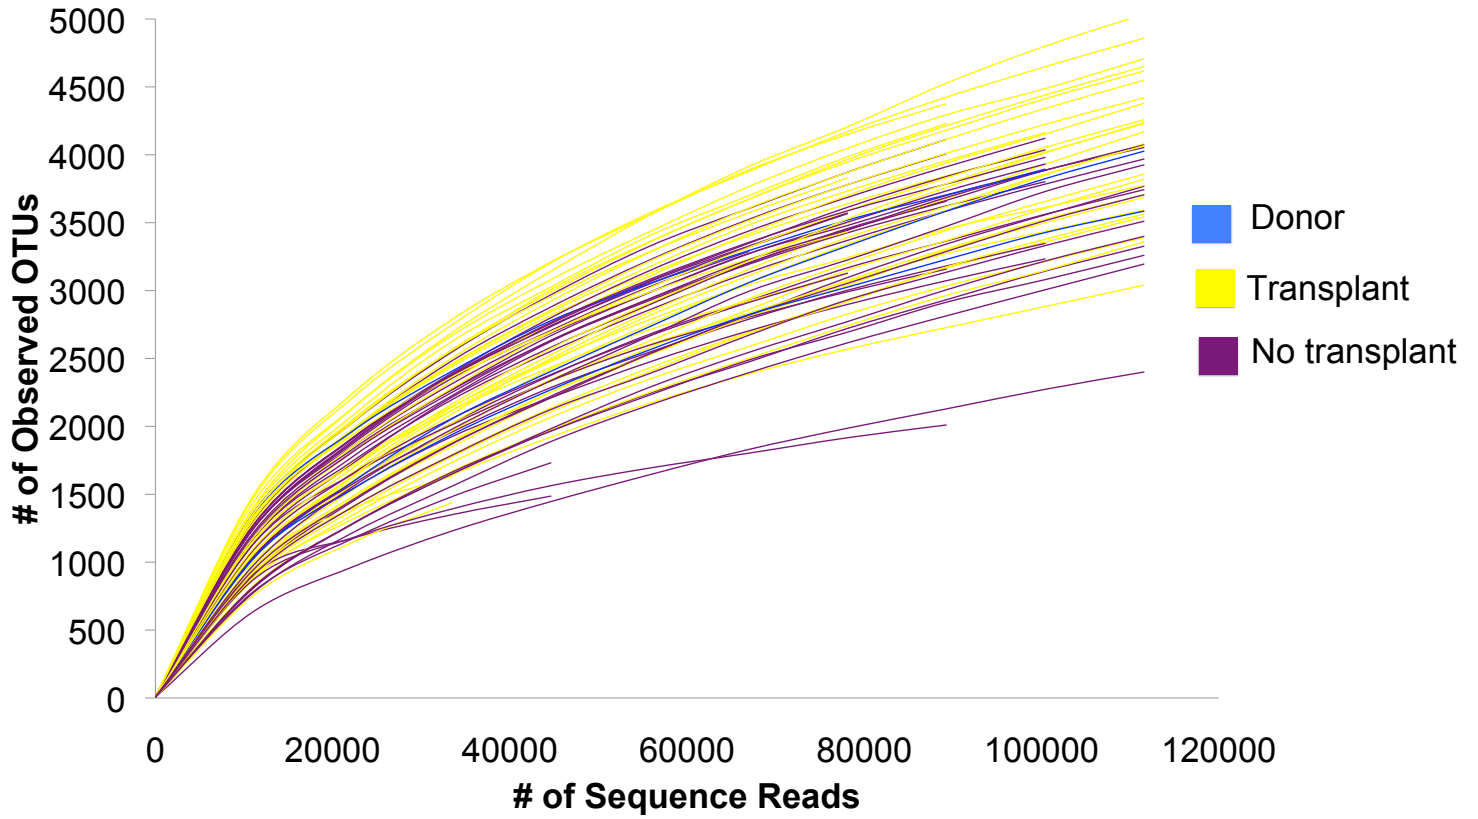

Figure S2 Venn diagram exhibiting the number of unique and shared OTUs among the donor, transplant, and no transplant groups immediately after the transfer period. Numbers in each section reflect OTUs in that section

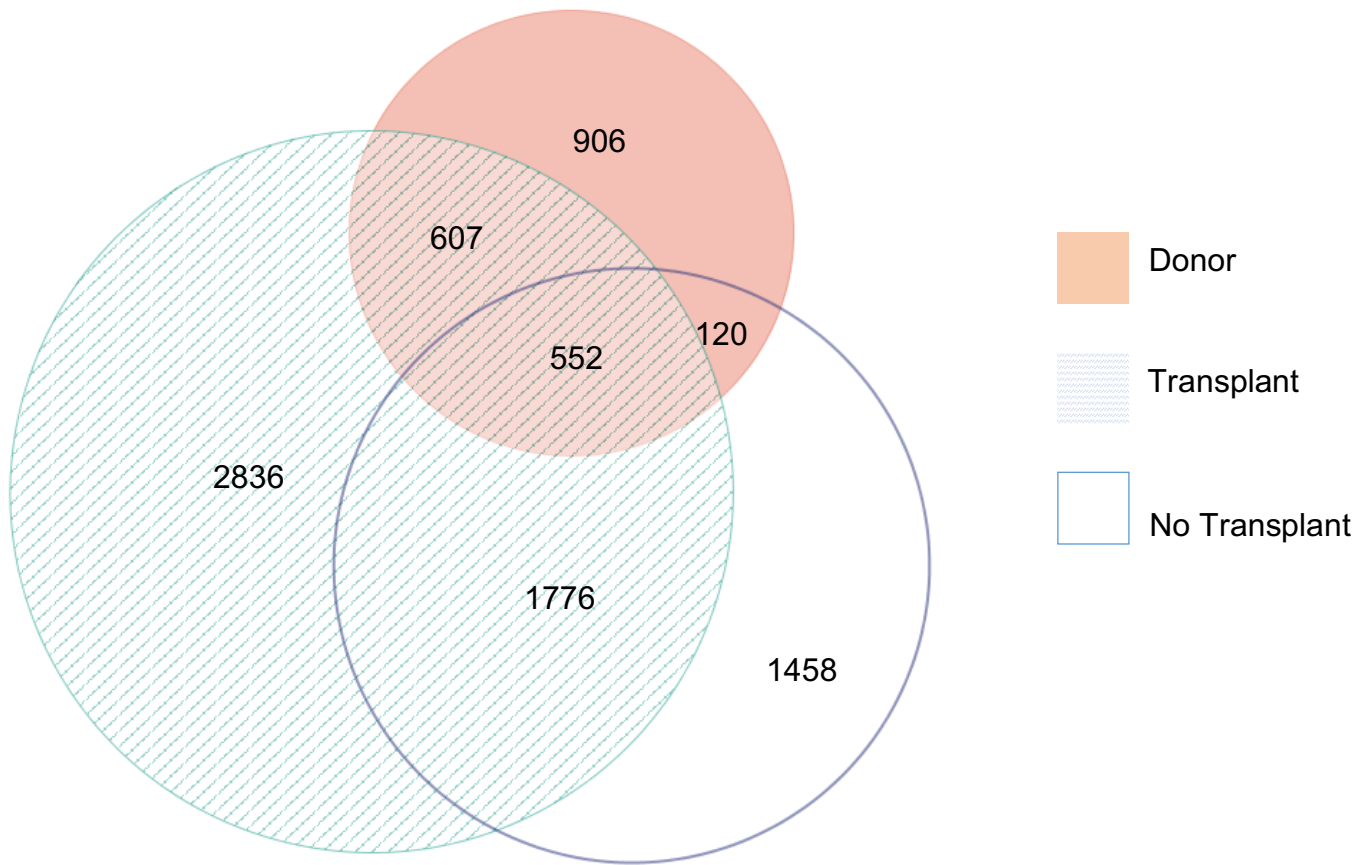

Supplement: NIHMS832994-supplement-Supplmental.pdf [file NIHMS832994-supplement-Supplmental.pdf]
